# Supplementary material for: A machine learning approach for estimating supercapacitor performance of graphene oxide nano-ring based electrode materials
Source: Royal Society of Chemistry journal article supplement (doi:10.1039/d4ya00577e), 2024-12-05
Supplement: d4ya00577e1.pdf [file d4ya00577e1.pdf]

## SUPPLEMENTARY FILE

### **A machine learning approach for estimating supercapacitor performance of graphene oxide nano-rings based electrode materials**

Gaurav Kumar Yogesh<sup>#,1</sup>, Debabrata Nandi<sup>#,2</sup>, Rungsima Yeetsorn<sup>3</sup>, Waritnan Wanchan<sup>3</sup>, Chandni Devi<sup>1</sup>, Ravi Pratap Singh<sup>4</sup>, Aditya Vasistha<sup>1</sup>, Mukesh Kumar<sup>1</sup>, Pankaj Koinkar<sup>5,†</sup>, Kamlesh Yadav<sup>6,\*</sup>

<sup>1</sup>Department of Physics and Astrophysics, School of Engineering and Technology, Central University of Haryana, Mahendergarh-123031, Haryana, India

<sup>2</sup>Regional Centre of Advanced Technologies and Materials, Czech Advanced Technology and Research Institute (CATRIN), Palacký University Olomouc, Šlechtitelů 241/27, Olomouc – Holic 783 71, Czech Republic

<sup>3</sup>Materials and Production Engineering, The Sirindhorn International Thai-German Graduate School of Engineering, King Mongkut's University of Technology North Bangkok, Bangkok-10800, Thailand

<sup>4</sup>Department of Physics, School of Basic Sciences, Central University of Punjab, Bathinda-151401, Punjab, India

<sup>5,†</sup> Graduate School of Technology, Industrial and Social Science, Tokushima University, 2-1 Minamijosanjima Cho, Tokushima-7708506, Japan

<sup>6,\*</sup> Department of Physics, University of Allahabad, Uttar Pradesh, Prayagraj, 211002, India

<sup>\*,†</sup>**Corresponding Author Email:** [koinkar@tokushima-u.ac.jp](mailto:koinkar@tokushima-u.ac.jp), [kamleshyadav@allduniv.ac.in](mailto:kamleshyadav@allduniv.ac.in)

**Table S1. Electrochemical predictor and response variable for ML training.**

|           | <b>ELEC</b> | <b>CNC</b> | <b>CD</b> | <b>PW</b> | <b>SCAP</b> |
|-----------|-------------|------------|-----------|-----------|-------------|
| <b>1</b>  | 'KOH'       | 2          | 2         | 1         | 236         |
| <b>2</b>  | 'NaClO4'    | 1          | 0.5000    | 3         | 117         |
| <b>3</b>  | 'KOH'       | 6          | 0.2000    | 0.8000    | 207         |
| <b>4</b>  | 'KOH'       | 6          | 0.2000    | 0.8000    | 193         |
| <b>5</b>  | 'H2SO4'     | 1          | 1         | 1         | 253         |
| <b>6</b>  | 'KOH'       | 6          | 1         | 1         | 170         |
| <b>7</b>  | 'KOH'       | 6          | 0.5000    | 1         | 176         |
| <b>8</b>  | 'H2SO4'     | 2          | 0.5000    | 0.7000    | 208         |
| <b>9</b>  | 'H2SO4'     | 1          | 1         | 0.8000    | 240         |
| <b>10</b> | 'KOH'       | 6          | 0.2000    | 1         | 225         |
| <b>11</b> | 'KOH'       | 6          | 1         | 1         | 159         |
| <b>12</b> | 'KOH'       | 6          | 0.5000    | 2         | 210         |
| <b>13</b> | 'KOH'       | 6          | 0.5000    | 1         | 269         |
| <b>14</b> | 'KOH'       | 6          | 0.2000    | 1         | 288         |

|    | <b>ELEC</b> | <b>CNC</b> | <b>CD</b> | <b>PW</b> | <b>SCAP</b> |
|----|-------------|------------|-----------|-----------|-------------|
| 15 | 'KOH'       | 6          | 0.5000    | 0.8000    | 239         |
| 16 | 'KOH'       | 6          | 0.2000    | 0.9000    | 227         |
| 17 | 'H2SO4'     | 1          | 0.2000    | 0.9000    | 262         |
| 18 | 'HCl'       | 1          | 1         | 2         | 275         |
| 19 | 'H2SO4'     | 1          | 1         | 1.2000    | 111         |
| 20 | 'H2SO4'     | 1          | 0.1000    | 1.2000    | 240         |
| 21 | 'KOH'       | 6          | 1         | 1         | 210         |
| 22 | 'KOH'       | 1          | 0.5000    | 1.5000    | 150         |
| 23 | 'Na2SO4'    | 1          | 3         | 1         | 186         |
| 24 | 'KOH'       | 6          | 0.5000    | 1         | 266         |
| 25 | 'KOH'       | 1          | 1         | 1.1000    | 165         |
| 26 | 'H2SO4'     | 1          | 1         | 1.1000    | 283         |
| 27 | 'KOH'       | 6          | 1         | 1         | 214         |
| 28 | 'KOH'       | 6          | 0.5000    | 1         | 160         |
| 29 | 'H2SO4'     | 1          | 1         | 0.8000    | 225         |
| 30 | 'KOH'       | 6          | 0.5000    | 1.2000    | 275         |
| 31 | 'H2SO4'     | 1          | 0.5000    | 0.5000    | 132         |
| 32 | 'KOH'       | 6          | 0.5000    | 3         | 185         |
| 33 | 'KOH'       | 6          | 1         | 1         | 271         |
| 34 | 'KOH'       | 6          | 1         | 1         | 285         |
| 35 | 'H2SO4'     | 1          | 1         | 0.8000    | 206         |
| 36 | 'KOH'       | 3          | 0.1000    | 1         | 205         |
| 37 | 'H2SO4'     | 1          | 50        | 0.8000    | 273         |
| 38 | 'Na2SO4'    | 0.1000     | 1         | 1         | 128         |
| 39 | 'Na2SO4'    | 0.1000     | 5         | 1         | 74          |
| 40 | 'Na2SO4'    | 0.1000     | 7         | 1         | 62          |
| 41 | 'KCl'       | 0.1000     | 1         | 1         | 85.3000     |
| 42 | 'NaCl'      | 0.1000     | 0.2000    | 0.8000    | 75          |
| 43 | 'KOH'       | 0.3000     | 1         | 1         | 225         |
| 44 | 'KOH'       | 0.3000     | 1         | 1         | 230         |
| 45 | 'HOH'       | 0.3000     | 1         | 1         | 185         |
| 46 | 'H3PO4'     | 1          | 1         | 0.8000    | 14          |
| 47 | 'H2SO4'     | 1          | 0.2000    | 0.8000    | 180         |
| 48 | 'H2SO4'     | 0.1000     | 1.5000    | 2.5000    | 170         |
| 49 | 'H2SO4'     | 2          | 1         | 1         | 194         |
| 50 | 'LiTFSI'    | 0.1000     | 0.5000    | 3.5000    | 99          |
| 51 | 'KOH'       | 6          | 0.1000    | 1         | 97          |
| 52 | 'Na2SO4'    | 0.5000     | 1.0400    | 0.8000    | 141         |
| 53 | 'KOH'       | 6          | 0.2000    | 0.7000    | 300         |
| 54 | 'Na2SO4'    | 1          | 1         | 0.8000    | 128         |
| 55 | 'KOH'       | 5          | 0.7500    | 1         | 182         |

|    | ELEC    | CNC | CD     | PW     | SCAP    |
|----|---------|-----|--------|--------|---------|
| 56 | 'KOH'   | 6   | 0.4000 | 0.8000 | 260     |
| 57 | 'KOH'   | 6   | 1      | 1      | 236     |
| 58 | 'KOH'   | 5   | 0      | 3      | 97      |
| 59 | 'KOH'   | 6   | 0.1000 | 1      | 244     |
| 60 | 'KOH'   | 1   | 2      | 2.5000 | 120     |
| 61 | 'H2SO4' | 1   | 0.1000 | 0.8000 | 238     |
| 62 | 'H2SO4' | 1   | 5      | 0.8000 | 140     |
| 63 | 'KOH'   | 6   | 0.1000 | 2      | 80.4000 |
| 64 | 'KOH'   | 6   | 0.1000 | 1      | 41.5000 |

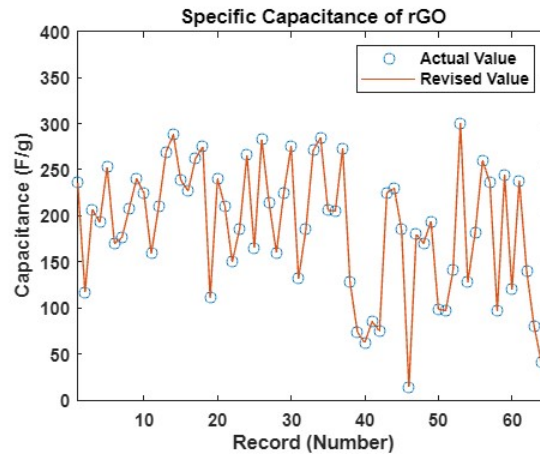

Fig. S1. The actual capacitance and revised outlier capacitance of GO-based electrode materials.

## 1. Neural Network

Table S2. Hyperparameter optimization observation table for ANN training.

```

=====
| Iter | Eval | Objective: | Objective | BestSoFar | BestSoFar | Activations | Standardize |
| Lambda | result | LayerSizes | log(1+loss) | runtime | (observed) | (estim.) | |
|=====
| 1 | Best | 8.53 | 2.7022 | 8.53 | 8.53 | sigmoid | false |
2.3991e-06 | [ 2 1] |
| 2 | Accept | 12.198 | 8.512 | 8.53 | 8.6758 | relu | true |
6.4779e-05 | [230 22] |
| 3 | Best | 8.3912 | 2.4262 | 8.3912 | 8.5276 | relu | false |
0.070108 | [ 3 1 2] |
| 4 | Accept | 8.9911 | 0.34152 | 8.3912 | 8.4936 | none | true |
30.764 | 37 |
| 5 | Accept | 8.5461 | 3.0176 | 8.3912 | 8.3913 | sigmoid | false |
0.004881 | [ 2 1] |
| 6 | Accept | 8.8727 | 3.079 | 8.3912 | 8.3916 | relu | false |
2.6967 | [ 3 2 13] |
| 7 | Accept | 9.2455 | 0.17246 | 8.3912 | 8.3916 | sigmoid | false |
20.886 | [ 2 16] |
| 8 | Accept | 8.5868 | 0.79519 | 8.3912 | 8.392 | relu | false |
5.474e-07 | [ 5 2 2] |
| 9 | Accept | 9.2564 | 0.96273 | 8.3912 | 8.3919 | relu | true |
113.1 | [ 6 1 1] |
=====

```

```

| 10 | Accept | 8.53 | 0.15916 | 8.3912 | 8.3918 | tanh | false |
6.0806e-07 | [ 2 1 1] |
| 11 | Accept | 8.4139 | 14.205 | 8.3912 | 8.392 | tanh | false |
7.0058e-07 | [ 37 281 35] |
| 12 | Accept | 9.0035 | 7.2386 | 8.3912 | 8.3921 | tanh | false |
0.0062681 | [ 21 5 289] |
| 13 | Accept | 8.6055 | 1.2125 | 8.3912 | 8.3918 | tanh | false |
4.5312e-06 | [ 2 294 1] |
| 14 | Accept | 8.53 | 0.11548 | 8.3912 | 8.3917 | tanh | true |
5.8047e-07 | [ 17 22 1] |
| 15 | Accept | 8.6963 | 2.5619 | 8.3912 | 8.3918 | tanh | true |
1.6748e-06 | [151 1 294] |
| 16 | Accept | 8.5624 | 25.081 | 8.3912 | 8.3921 | tanh | true |
1.1696 | [ 1 260 290] |
| 17 | Accept | 10.277 | 0.38827 | 8.3912 | 8.3918 | sigmoid | false |
19.438 | [150 51 1] |
| 18 | Accept | 8.9011 | 0.22659 | 8.3912 | 8.3918 | none | false |
1.7565e-07 | [ 13 1] |
| 19 | Accept | 8.53 | 0.094858 | 8.3912 | 8.3918 | sigmoid | true |
1.5779e-07 | [ 2 1] |
| 20 | Accept | 8.4792 | 0.19636 | 8.3912 | 8.3919 | sigmoid | true |
16.75 | [ 1 300] |

```

```

=====
| Iter | Eval | Objective: | Objective | BestSoFar | BestSoFar | Activations | Standardize |
Lambda | LayerSizes |
| result | log(1+loss) | runtime | (observed) | (estim.) |
=====
| 21 | Accept | 8.9011 | 1.2148 | 8.3912 | 8.3918 | none | true |
7.2905e-06 | [ 1 10] |
| 22 | Accept | 8.525 | 0.10199 | 8.3912 | 8.3922 | tanh | false |
1.7368e-07 | [ 71 1] |
| 23 | Accept | 8.9739 | 16.85 | 8.3912 | 8.3924 | tanh | false |
2.2711 | [ 91 300] |
| 24 | Accept | 8.5062 | 1.4397 | 8.3912 | 8.3917 | sigmoid | true |
0.088287 | 37 |
| 25 | Accept | 9.2784 | 1.2318 | 8.3912 | 8.3923 | relu | false |
39.434 | [ 10 1] |
| 26 | Accept | 8.4956 | 1.153 | 8.3912 | 8.3921 | sigmoid | true |
4.7795e-06 | [ 85 39 1] |
| 27 | Accept | 8.53 | 0.069716 | 8.3912 | 8.3915 | sigmoid | false |
3.6875e-07 | 1 |
| 28 | Accept | 10.585 | 0.088884 | 8.3912 | 8.3915 | sigmoid | true |
1016 | [ 17 9] |
| 29 | Accept | 8.8048 | 7.1948 | 8.3912 | 8.3914 | sigmoid | true |
0.00017906 | [ 80 78 2] |
| 30 | Accept | 8.6623 | 24.618 | 8.3912 | 8.3914 | tanh | false |
8.1101e-06 | [ 39 155 287] |

```

Optimization completed.  
MaxObjectiveEvaluations of 30 reached.  
Total function evaluations: 30  
Total elapsed time: 153.3897 seconds  
Total objective function evaluation time: 127.4503

Best observed feasible point:

| Activations | Standardize | Lambda   | LayerSizes |
|-------------|-------------|----------|------------|
| relu        | false       | 0.070108 | 3 1 2      |

Observed objective function value = 8.3912  
Estimated objective function value = 8.3914  
Function evaluation time = 2.4262

Best estimated feasible point (according to models):

| Activations | Standardize | Lambda   | LayerSizes |
|-------------|-------------|----------|------------|
| relu        | false       | 0.070108 | 3 1 2      |

Estimated objective function value = 8.3914  
Estimated function evaluation time = 2.4259

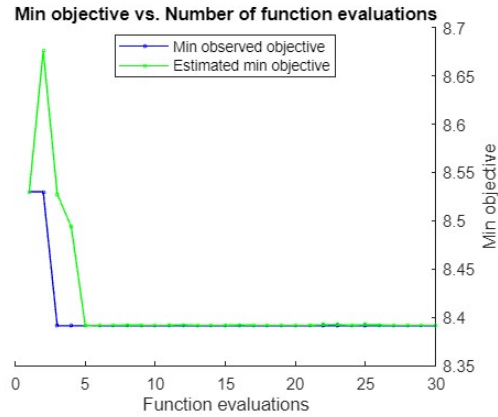

**Fig. S2. Comparison plot for minimum observed and estimated objective values during ANN model.**

```
mdl =
  RegressionNeuralNetwork
    ResponseName: 'Y'
    CategoricalPredictors: []
    ResponseTransform: 'none'
    NumObservations: 64
    HyperparameterOptimizationResults: [1x1 BayesianOptimization]
    LayerSizes: [3 1 2]
    Activations: 'relu'
    OutputLayerActivation: 'none'
    Solver: 'LBFGS'
    ConvergenceInfo: [1x1 struct]
    TrainingHistory: [1000x7 table]
```

```
Properties, Methods
yNet = 64x1
174.1323
92.9361
215.5875
215.5875
201.3410
212.4765
211.9619
216.5713
205.2754
211.6531
```

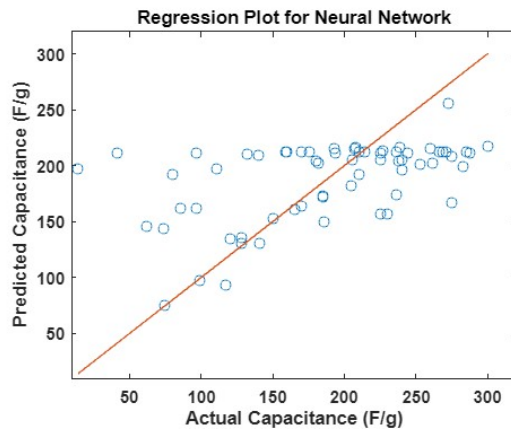

**Fig. S3. Predicted vs Actual capacitance of ANN model.**

```
yNet2 = 212.4765
MSE = 3.4842e+03
```

**testMSE = 3.4842e+03**  
**RMSE = 59.0275**  
**R2 = 0.2602**  
**R = 0.5101**  
**MAE = 44.5477**

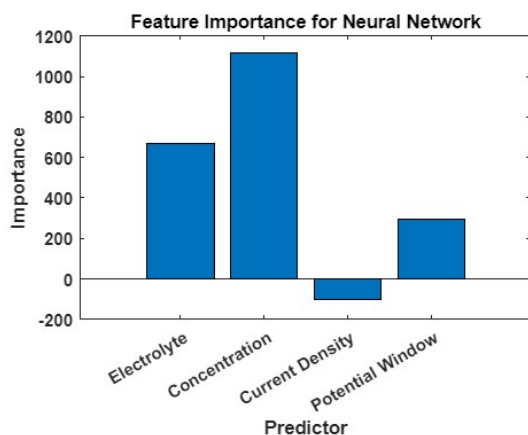

**Fig. S4. Predictor estimate of ANN model.**

## 2. Regression Tree

**Table S3. Hyperparameter optimization observation table for RT model.**

| Iter | Eval result | Objective: log(1+loss) | Objective runtime | BestSoFar (observed) | BestSoFar (estim.) | MinLeafSize |
|------|-------------|------------------------|-------------------|----------------------|--------------------|-------------|
| 1    | Best        | 8.3909                 | 0.94647           | 8.3909               | 8.3909             | 7           |
| 2    | Accept      | 8.5521                 | 0.12766           | 8.3909               | 8.4246             | 3           |
| 3    | Accept      | 8.6091                 | 0.061359          | 8.3909               | 8.4093             | 1           |
| 4    | Accept      | 8.4965                 | 0.083907          | 8.3909               | 8.4382             | 17          |
| 5    | Accept      | 8.3909                 | 0.094932          | 8.3909               | 8.391              | 7           |
| 6    | Accept      | 8.4881                 | 0.036855          | 8.3909               | 8.391              | 12          |
| 7    | Accept      | 8.5302                 | 0.034922          | 8.3909               | 8.391              | 6           |
| 8    | Accept      | 8.4965                 | 0.03585           | 8.3909               | 8.391              | 18          |
| 9    | Accept      | 8.4574                 | 0.039428          | 8.3909               | 8.391              | 8           |
| 10   | Accept      | 8.5209                 | 0.034828          | 8.3909               | 8.391              | 10          |
| 11   | Accept      | 8.5689                 | 0.03855           | 8.3909               | 8.391              | 14          |
| 12   | Accept      | 8.4693                 | 0.03404           | 8.3909               | 8.391              | 23          |
| 13   | Accept      | 8.5422                 | 0.061848          | 8.3909               | 8.391              | 26          |
| 14   | Accept      | 8.4887                 | 0.036786          | 8.3909               | 8.391              | 21          |
| 15   | Accept      | 8.3909                 | 0.038442          | 8.3909               | 8.391              | 7           |
| 16   | Accept      | 8.4693                 | 0.036064          | 8.3909               | 8.391              | 24          |
| 17   | Accept      | 8.4396                 | 0.04027           | 8.3909               | 8.391              | 2           |
| 18   | Accept      | 8.5227                 | 0.035928          | 8.3909               | 8.391              | 4           |
| 19   | Accept      | 8.53                   | 0.042154          | 8.3909               | 8.391              | 32          |
| 20   | Accept      | 8.3909                 | 0.041007          | 8.3909               | 8.391              | 7           |
| 21   | Accept      | 8.5713                 | 0.043355          | 8.3909               | 8.391              | 5           |
| 22   | Accept      | 8.4785                 | 0.033942          | 8.3909               | 8.391              | 9           |
| 23   | Accept      | 8.53                   | 0.036874          | 8.3909               | 8.391              | 29          |
| 24   | Accept      | 8.5124                 | 0.037725          | 8.3909               | 8.391              | 11          |
| 25   | Accept      | 8.4909                 | 0.038175          | 8.3909               | 8.391              | 15          |
| 26   | Accept      | 8.5369                 | 0.03586           | 8.3909               | 8.391              | 13          |
| 27   | Accept      | 8.4965                 | 0.03876           | 8.3909               | 8.391              | 19          |
| 28   | Accept      | 8.4961                 | 0.036615          | 8.3909               | 8.391              | 16          |
| 29   | Accept      | 8.4861                 | 0.03545           | 8.3909               | 8.391              | 20          |
| 30   | Accept      | 8.53                   | 0.035184          | 8.3909               | 8.391              | 28          |

Optimization completed.

MaxObjectiveEvaluations of 30 reached.  
 Total function evaluations: 30  
 Total elapsed time: 19.8992 seconds  
 Total objective function evaluation time: 2.2732

Best observed feasible point:

**MinLeafSize**

7

Observed objective function value = 8.3909  
 Estimated objective function value = 8.391  
 Function evaluation time = 0.94647

Best estimated feasible point (according to models):

**MinLeafSize**

7

Estimated objective function value = 8.391  
 Estimated function evaluation time = 0.052774

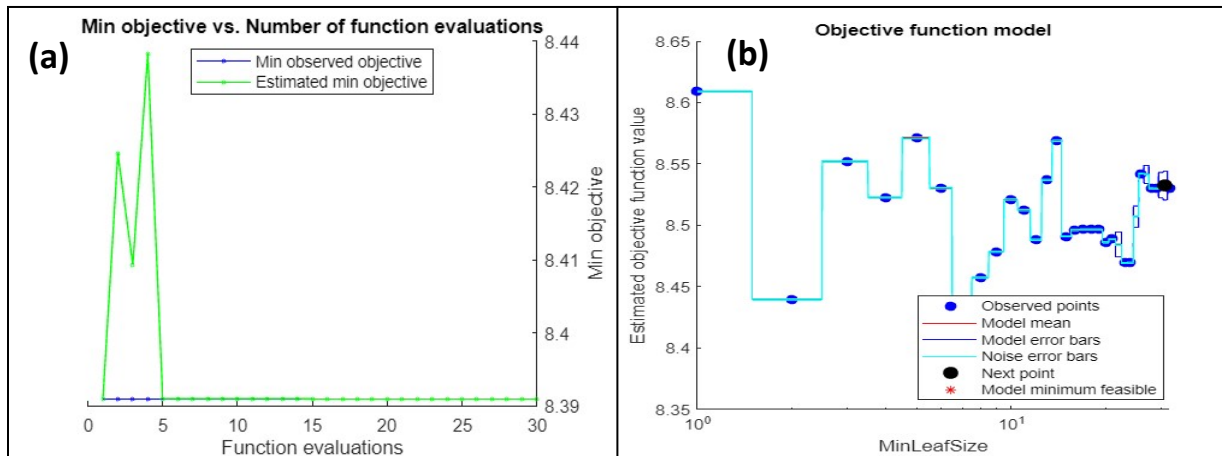

**Fig. S5. (a) Comparison plot for minimum observed and estimated objective values during RT model and (b) illustration of estimated objective function value against MinLeafSize.**

```
mdl2 =
  RegressionTree
    PredictorNames: {'Electrolyte' 'Concentration' 'Current Density'
'Potential Window'}
    ResponseName: 'Y'
    CategoricalPredictors: []
    ResponseTransform: 'none'
    NumObservations: 64
    HyperparameterOptimizationResults: [1x1 BayesianOptimization]
```

```
Properties, Methods
yTree = 64x1
172.4545
154.3000
202.5000
202.5000
212.3333
220.7143
235.0000
212.3333
212.3333
```

202.5000

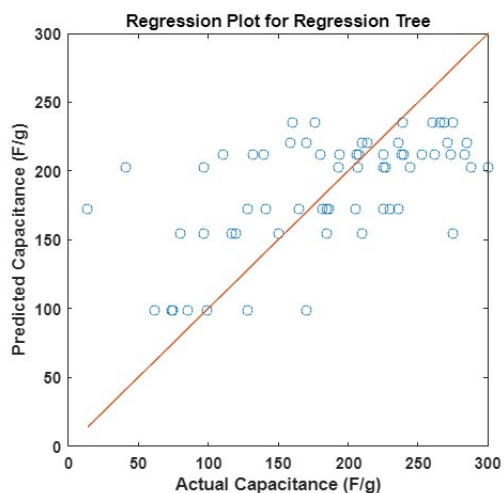

Fig. S6. Predicted vs Actual capacitance of RT model.

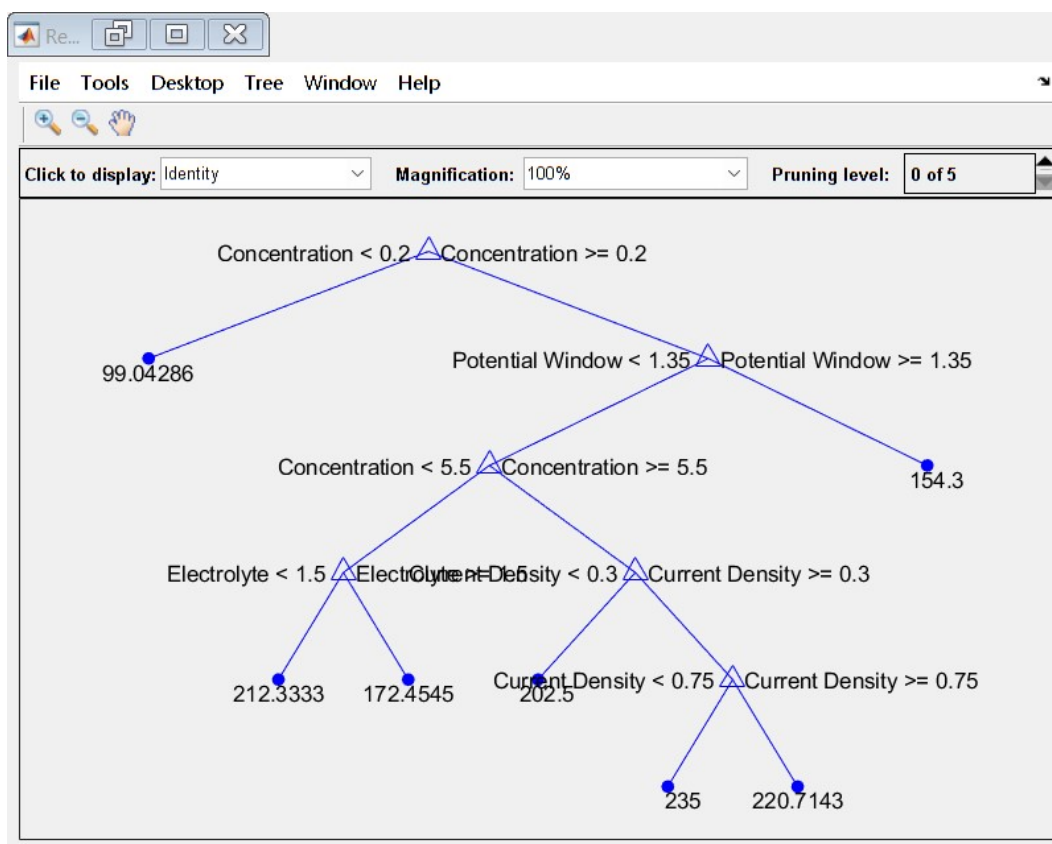

Fig. S7. Visualization of decision obtained from regression tree.

yTree2 = 220.7143  
MSE = 3.1338e+03  
testMSE = 3.4842e+03  
RMSE = 55.9800  
R2 = 0.3346  
R = 0.5785  
MAE = 43.8757



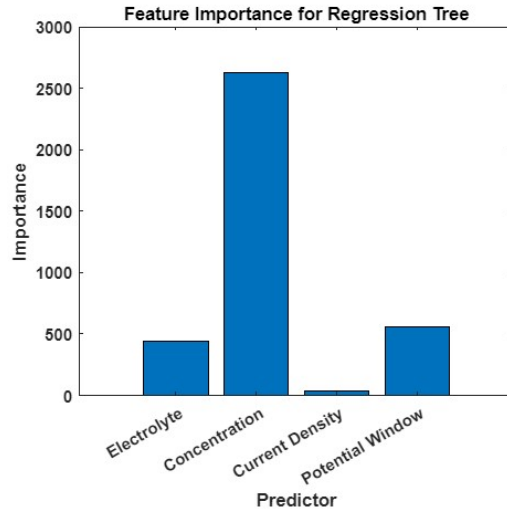

**Fig. S8. Predictor estimate of RT model.**

### 3. Support Vector Machine

```
mdl3 =
  RegressionSVM
    ResponseName: 'Y'
    CategoricalPredictors: []
    ResponseTransform: 'none'
        Alpha: [61x1 double]
        Bias: 163.0130
    KernelParameters: [1x1 struct]
        Mu: [4.9062 3.0953 1.7139 1.1797]
        Sigma: [2.5306 2.5678 6.2472 0.6315]
    NumObservations: 64
    BoxConstraints: [64x1 double]
    ConvergenceInfo: [1x1 struct]
    IsSupportVector: [64x1 logical]
    Solver: 'SMO'
```

#### Properties, Methods

```
ySVM = 64x1
207.9692
124.7281
224.0109
224.0109
228.5079
221.6664
221.7180
200.2549
213.8801
221.3860
```

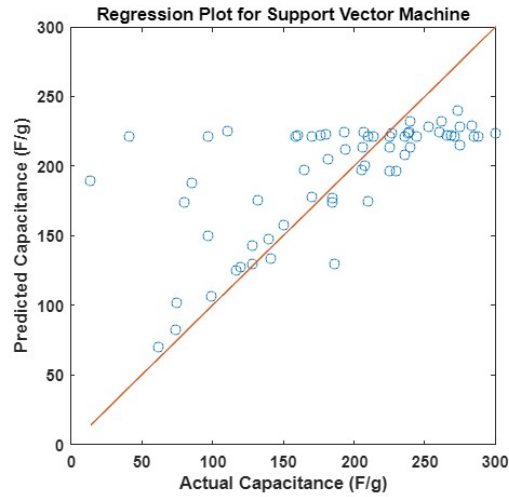

Fig. S9. Predicted vs Actual capacitance of SVM model.

$y_{SVM2} = 221.6664$   
 $MSE = 2.7789e+03$   
 $testMSE = 2.7789e+03$   
 $RMSE = 52.7155$   
 $R^2 = 0.4100$   
 $R = 0.6501$   
 $MAE = 37.1678$

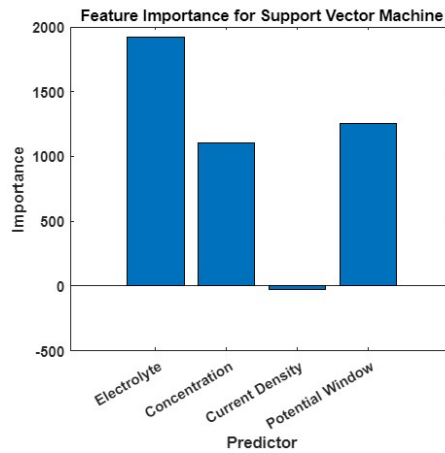

Fig. S10. Predictor estimate of SVM model.

#### 4. Linear Regression

$mdl4 =$   
 Linear regression model:  
 $y \sim 1 + x1 + x2 + x3 + x4$

Table S4. Coefficient estimate for linear regression model.

Estimated Coefficients:

|             | Estimate | SE     | tStat   | pValue     |
|-------------|----------|--------|---------|------------|
| (Intercept) | 216.12   | 22.453 | 9.6257  | 1.0523e-13 |
| x1          | -9.0825  | 3.3747 | -2.6914 | 0.0092437  |
| x2          | 11.06    | 3.2651 | 3.3873  | 0.0012619  |
| x3          | 1.0868   | 1.2811 | 0.84833 | 0.39968    |
| x4          | -16.794  | 12.751 | -1.3171 | 0.19291    |

Number of observations: 64, Error degrees of freedom: 59  
 Root Mean Squared Error: 61.9  
 R-squared: 0.25, Adjusted R-Squared: 0.2  
 F-statistic vs. constant model: 4.93, p-value = 0.0017  
 yLR = 64x1  
 169.1275  
 86.5184  
 214.7697  
 214.7697  
 202.3935  
 212.2803  
 211.7369  
 217.9484  
 205.7524  
 211.4108

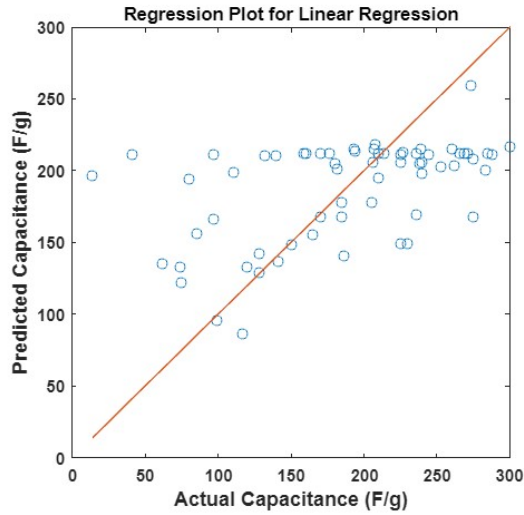

**Fig. S11. Predicted vs Actual capacitance of LR model.**

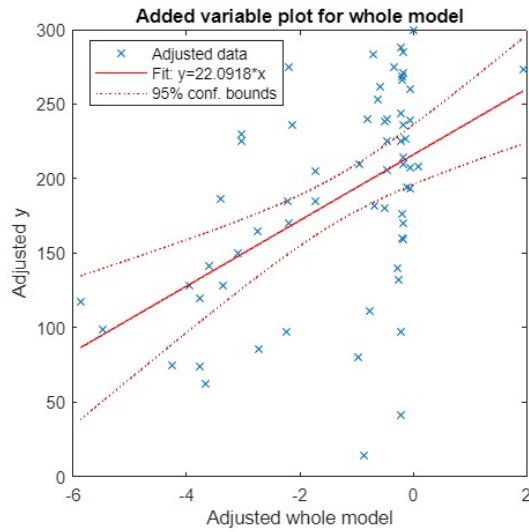

**Fig. S12. Plot for adjusted whole model vs. adjusted y, with a fitted linear regression line (red) and 95% confidence bounds (dotted red lines), illustrating the model's fit and prediction confidence.**

ans = 5x5 table

|      | SumSq      | DF | MeanSq     | F       | pValue |
|------|------------|----|------------|---------|--------|
| 1 x1 | 2.7739e+04 | 1  | 2.7739e+04 | 7.2435  | 0.0092 |
| 2 x2 | 4.3939e+04 | 1  | 4.3939e+04 | 11.4739 | 0.0013 |

|                | SumSq      | DF | MeanSq     | F      | pValue |
|----------------|------------|----|------------|--------|--------|
| <b>3 x3</b>    | 2.7559e+03 | 1  | 2.7559e+03 | 0.7197 | 0.3997 |
| <b>4 x4</b>    | 6.6429e+03 | 1  | 6.6429e+03 | 1.7347 | 0.1929 |
| <b>5 Error</b> | 2.2594e+05 | 59 | 3.8295e+03 | 1      | 0.5000 |

$y_{SVM2} = 212.2803$   
 $MSE = 3.5303e+03$   
 $RMSE = 59.4162$   
 $R^2 = 0.2504$   
 $R = 0.5004$   
 $MAE = 45.4212$

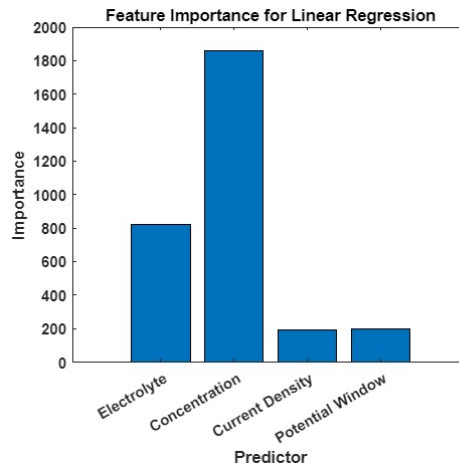

**Fig. S13. Predictor estimate of LR model.**
